# Supplementary material for: In situhigh pressure study of an elastic crystal by FTIR spectroscopy
Source: Royal Society of Chemistry journal article supplement (doi:10.1039/c7ce01664f), 2017-01-01
Supplement: c7ce01664f1.pdf [file c7ce01664f1.pdf]

## **Supporting Information**

### **In-situ high pressure study of an elastic crystal by FTIR spectroscopy**

Manish Kumar Mishra,<sup>\*,a,b</sup> Pallavi Ghalsasi<sup>c</sup>, M.N. Deo<sup>d</sup>, Himat Bhatt<sup>d</sup> Himanshu K.  
Poswal<sup>d</sup>, Soumyajit Ghosh<sup>\*,a, e</sup> and Somnath Ganguly<sup>\*,a</sup>

## S1. Experiments details:

**Materials.** All the compounds were purchased from Sigma-Aldrich. Commercially available solvents were used as received without further purification.

**Single crystal preparation:** Long and acicular, 3-5 mm long and 0.02-0.05 mm thick, elastic bendable crystals of DBA were prepared by adding one equivalent each of the corresponding 2,3-dichlorobenzaldehyde and 4-bromoaniline in hot methanol followed by slow evaporation of the solution at ambient conditions.

### In-situ high pressure FTIR experiment:

Defect free selected crystals were used for single crystal X-ray (SCXRD) and HP-FTIR studies. In-situ high pressure FTIR spectra were recorded using Bruker's VERTEX80V Fourier transform infrared spectrometer attached with a HYPERION 2000 infrared microscope with 15x objectives equipped with a mid-infrared global source and HgCdTe detector. The reference spectra were recorded using pure KBr inside DAC (diamond anvil cell). The resolution was kept  $4\text{ cm}^{-1}$ . The high pressure FTIR measurements on DBA crystals were carried out using a short symmetric DAC (diamond anvil cell), equipped with type IIA diamonds and KBr as a pressure transmitting medium. Figure S1 shows lowest pressure ( $\sim 0\text{ GPa}$ ) FTIR spectrum of DBA crystal recorded inside DAC. The sample was filled inside a 150-micron size hole in 50-micron thick gasket. Pressure was measured by ruby calibration system.<sup>1</sup> Both the sample as well as reference spectra were normalized for diamond contribution. The sample transmittance spectra were obtained after background correction using the reference spectra.

**Figure S1.** FTIR spectrum of DBA crystal recorded inside DAC at 0 GPa.

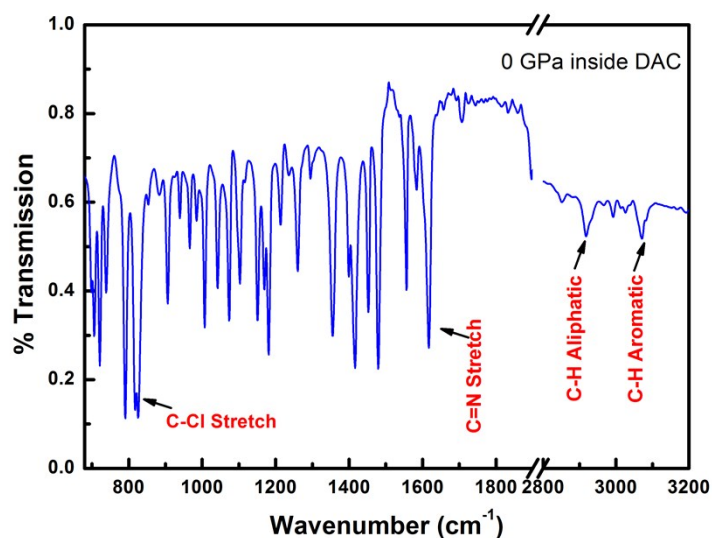

**Figure S2.** FT-IR spectra in the 600-3600  $\text{cm}^{-1}$  region of the DBA crystal on compression to 13.8 GPa pressure from ambient pressure.

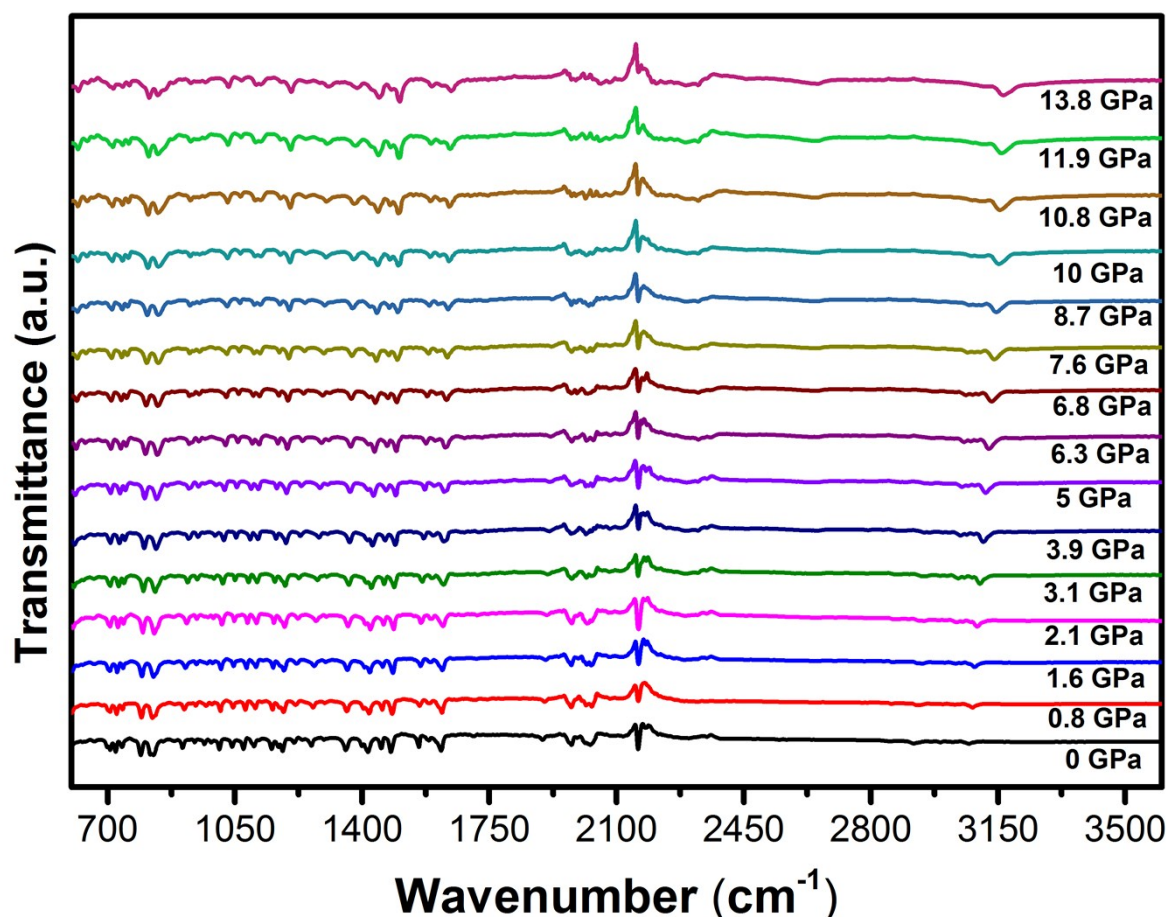

**Figure S3.** Selected FT-IR spectra in the 600-1000  $\text{cm}^{-1}$  region of the DBA crystal on compression to 13.8 GPa pressure from ambient pressure. The orange shaded bar represents the C-Cl stretching mode on compression.

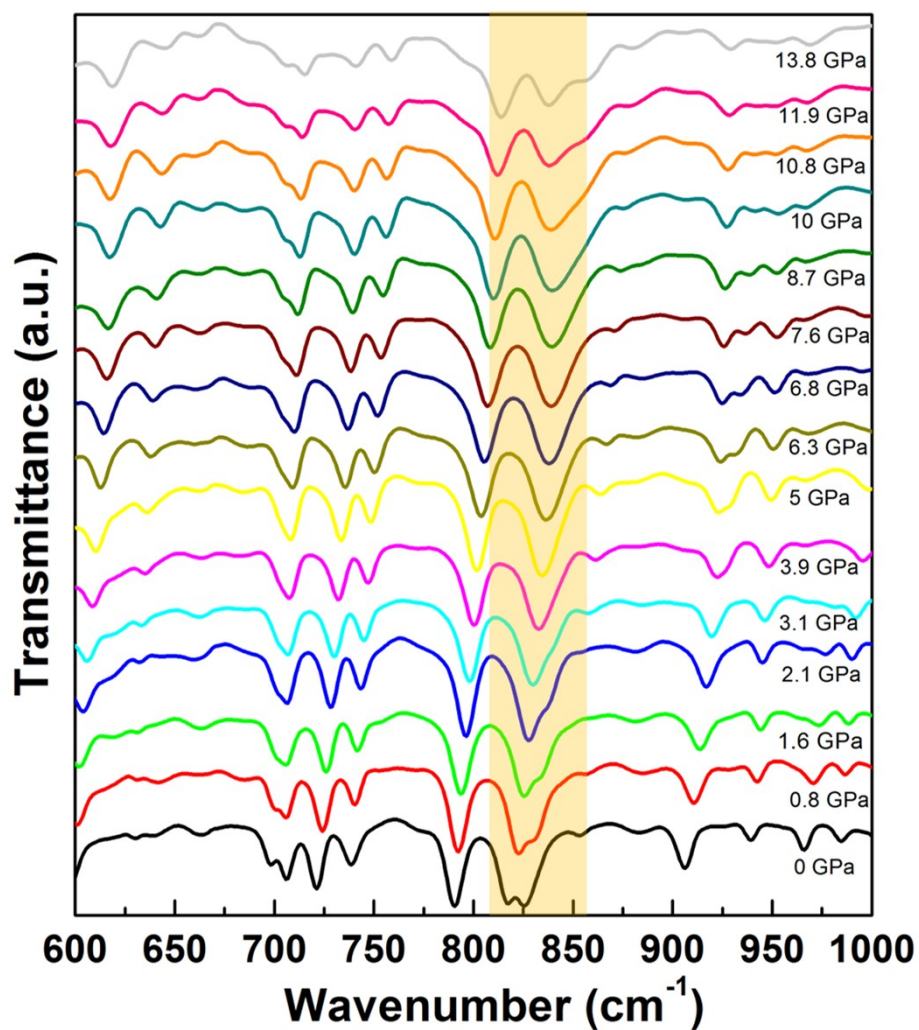

**Figure S4.** FT-IR spectra 600-3600  $\text{cm}^{-1}$  region of DBA crystal on decompression to an ambient pressure from 13.8 GPa. Here, we shown the pressure range from 7.9 to 0 GPa because no major difference appeared from the range of 13.8 to 7.9 while decompression.

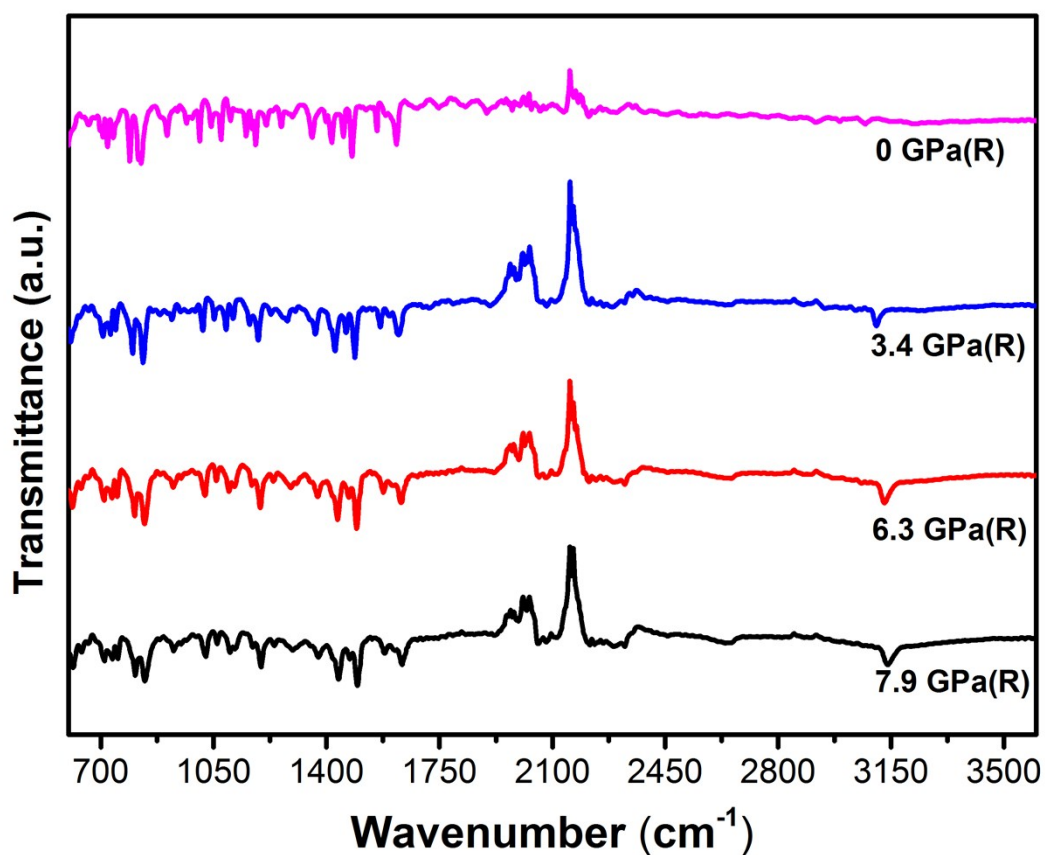

**References:**

1. R. A. Forman, G. J. Piermarini, J. D. Barnett and S. Block, *Science*, 1972, **176**, 284-285.
